# Supplementary material
Source: Elsevier journal article supplement (https://www.sciencedirect.com/science/article/pii/S2530064417300627)
Supplement: mmc1 [file S2530064417300627:mmc1.docx]

**Supplementary material**

Table S1: Value of independent variables per sampling site. Dist. house: distance to the nearest household; dist. road: distance to the nearest road; dog population: dog population size in the vicinity. Site ID as indicated in Figure 1.

| Site ID | Dist. household (m) | Dist. road (m) | Dog population |
| --- | --- | --- | --- |
| 1 | 266 | 1458.3 | 6 |
| 2 | 217 | 150.0 | 5 |
| 3 | 242 | 287.7 | 15 |
| 4 | 610 | 635.9 | 10 |
| 5 | 295 | 402.8 | 47 |
| 6 | 1410 | 1444.6 | 0 |
| 7 | 455 | 260.3 | 15 |
| 8 | 205 | 369.9 | 9 |
| 9 | 356 | 635.3 | 13 |
| 10 | 388 | 770.6 | 7 |
| 11 | 697 | 488.2 | 18 |
| 12 | 1930 | 908.9 | 0 |
| 13 | 740 | 268.7 | 15 |
| 14 | 398 | 176.9 | 28 |
| 15 | 290 | 646.6 | 38 |
